# Supplementary material for: Selective inhibition of the hypoxia-inducible factor prolyl hydroxylase PHD3 by Zn(ii)
Source: Royal Society of Chemistry journal article supplement (doi:10.1039/c5cc02143j), 2015-01-01
Supplement: c5cc02143j1.pdf [file c5cc02143j1.pdf]

## Materials and methods

### 2.1 Materials

NiSO<sub>4</sub>, ZnCl<sub>2</sub>, MnCl<sub>2</sub>, CoCl<sub>2</sub>, FeSO<sub>4</sub>, L-ascorbic acid, and 2-oxopentanedioic acid (2-OG) were obtained from Sigma-Aldrich (St. Louis, MO, USA). Anti-PHD3 was obtained from Abcam (Cambridge, MA), and anti-PHD2 was from Cell Signaling Technology (Beverly, MA). The HIF-1 $\alpha$  peptide containing residues 556 to 575 denoted as F-P564 (fluorescein isothio-cyanate (FITC)-AminoCaproic Acid (ACA)-DLGLEALAPYIPADDDDFQLR) was synthesized by AnyGen (KwangJu, Korea). All other chemicals were of the highest grade commercially available.

### 2.2 Site- directed mutagenesis of PHD3

PCR primers were synthesized by Bioneer (Deajeon, Korea). Site-directed mutagenesis of Cys, Glu, Asp, Arg or His residues of PHD3 was conducted using the quikchange mutagenesis protocol provided by Stratagene, USA. All mutations were confirmed by DNA sequencing.

### 2.3 Preparation of recombinant proteins

Proteins were prepared as previously described (Cho et al, 2005). Briefly, plasmids for human VHL (amino acids 54–213) and human Elongin B (amino acids 1–118) in pGEX-4T-1 and for human Elongin C (amino acids 17–112) in pET29b were co-expressed in *Escherichia coli* (*E. coli*) BL21(DE3). Full-length human PHD2, truncated human PHD2 (amino acids 184–418) denoted as PHD2F and PHD2T, respectively, and full-length human PHD3 were subcloned into pET-28a (Novagen), pET-21b (Novagen), and pET-22b (Novagen), respectively and expressed in *E. coli* BL21(DE3). After induction with 0.5 mM isopropyl  $\beta$ -D-thiogalactoside at 18 °C for 15 hours, GST-VBC was purified using glutathione-Sepharose

(Amersham Biosciences) and PHD2F, PHD2T, and PHD3 were lysed by sonication in the buffer containing 50 mM sodium phosphate (pH = 8.0), 500 mM NaCl, 14 mM  $\beta$ -mercaptoethanol, 1 mM phenylmethanesulfonyl fluoride, and 10 mM imidazole. Triton X-100 was added into the lysate to final concentration of 1% and the lysate was incubated for 10-30 minutes at 4 °C. Proteins were purified using Ni-NTA agarose (Qiagen). The purified recombinant proteins were confirmed by SDS-PAGE and quantified by Bradford assay (Bio-Rad).

#### *2.4 Fluorescence polarization (FP)-based activity assays*

For determination of inhibitory effects of divalent metal ions on PHDs, 1  $\mu$ M of F-P564 was incubated with 1  $\mu$ g PHD2F, 0.25  $\mu$ g PHD2T or 1  $\mu$ g PHD3 in hydroxylation buffer containing 200  $\mu$ M ascorbic acid, 200  $\mu$ M 2-OG, 5 mM KCl, and 1.5 mM  $MgCl_2$  in the absence and presence of increasing concentrations of Zn(II), Ni(II), Mn(II), and Co(II) at 30 °C. To analyze effects of Zn(II) on PHDs' activities, concentrations of Zn(II) were varied from 0 to 160  $\mu$ M. For competition with Fe(II), varying concentrations of Zn(II) and Fe(II) were used. For Zn(II) pretreatment, PHD3 was incubated with 40 or 80  $\mu$ M of Zn(II) for 10 minutes at room temperature, followed by assaying in the presence of 0.5 mM DTT or 1 mM TCEP, respectively. After 2 hours of incubation at 30 °C, the hydroxylation reaction was stopped by heating for 1 minute at 95 °C. VBC (200 nM) was then added to the reaction solution and diluted to a final peptide concentration of 100 nM in EBC buffer (50 mM Tris-HCl, pH 8.0, 120 mM NaCl, 0.5% Nonidet P-40). The hydroxylation yields were analyzed by FP measurements using an Appliskan multimode microplate reader (Thermo Scientific, Waltham, MA, USA) with an excitation/emission filter set of 485/535 nm. Assays were performed in triplicate.  $IC_{50}$  values for compounds were determined by nonlinear regression with sigmoidal dose-response curves using Sigmaplot software.

### *2.5 Western blot analysis of the PHDs' oligomers*

PHDs (1  $\mu$ g) were incubated in the absence and presence of 80  $\mu$ M Zn(II) and/or 1 mM TCEP at 30 °C for 10 minutes. For immunoblotting, reaction mixtures were prepared in the SDS sample buffer with or without 2-mercaptoethanol, boiled for 2 minutes, and run on 4-15% linear gradient Tris-HCl ready gels (Bio-Rad). After electrophoresis, the protein was electroblotted onto poly(1,1-difluoroethylene) (PVDF) membranes (Millipore) by tank-electroblotting (Bio-Rad), and the membranes were blocked with 5% BSA for 1 hour. Then the membranes were incubated with anti-PHD2 (Cell signaling catalog #: 3293S) or anti-PHD3 (Abcam catalog #: ab30782) as the primary antibody and anti-rabbit IgG as the secondary antibody. Blots were developed with the ECL Plus Western Blotting Detection System (Thermo Scientific).

**Table S1 Primer list used in this study**

| PHD3 Mutants | Primer name | Primer sequence (5'→ 3')                        |
|--------------|-------------|-------------------------------------------------|
| E37A         | E37A F      | GGA CAA CTT CCT GGG CGC CGT GGT GGG CGA CTG C   |
|              | E37A R      | GCA GTC GCC CAC CAC GGC GCC CAG GAA GTT GTC C   |
| C42A         | C42A F      | CGA GGT GGT GGG CGA CGC CGT CCT GGA GCG CGT CA  |
|              | C42A R      | TGA CGC GCT CCA GGA CGG CGT CGC CCA CCA CCT CG  |
| E45A         | E45A F      | GCG ACT GCG TCC TGG CCC GCG TCA AGC AGC TG      |
|              | E45A R      | CAG CTG CTT GAC GCG GGC CAG GAC GCA GTC GC      |
| C52A         | C52A F      | GCG TCA AGC AGC TGC ACG CCA CCG GGG CCC TGC     |
|              | C52A R      | GCA GGG CCC CGG TGG CGT GCA GCT GCT TGA CGC     |
| R57A         | R57A F      | CGG GGC CCT GGC GGA CGG CCA G                   |
|              | R57A R      | CTG GCC GTC CGC CAG GGC CCC G                   |
| R71A         | R71A F      | CGC CGG CGT CTC CAA GGC ACA CCT GCG GGG CGA     |
|              | R71A R      | TCG CCC CGC AGG TGT GCC TTG GAG ACG CCG GCG     |
| H72A         | H72A F      | CCG GCG TCT CCA AGC GAG CCC TGC GGG GCG ACC A   |
|              | H72A R      | TGG TCG CCC CGC AGG GCT CGC TTG GAG ACG CCG G   |
| E85A         | E85A F      | GGG GGC AAC GCG GAG GGC TGC                     |
|              | E85A R      | GCA GCC CTC CGC GTT GCC CCC                     |
| E86A         | E86A F      | GGC AAC GAG GCG GGC TGC GAG                     |
|              | E86A R      | CTC GCA GCC CGC CTC GTT GCC                     |
| C88A         | C88A F      | GGC AAC GAG GAG GGC GCC GAG GCC ATC AGC TTC C   |
|              | C88A R      | GGA AGC TGA TGG CCT CGG CGC CCT CCT CGT TGC C   |
| E89A         | E89A F      | ACG AGG AGG GCT GCG CCG CCA TCA GCT TCC TC      |
|              | E89A R      | GAG GAA GCT GAT GGC GGC GCA GCC CTC CTC GT      |
| C124A        | C124A F     | AAG GCA ATG GTG GCT GCC TAT CCG GGA AAT GG      |
|              | C124A R     | CCA TTT CCC GGA TAG GCA GCC ACC ATT GCC TT      |
| D183A        | D183A F     | GTG GAG CCC ATT TTT GCC AGA CTC CTG TTC TTC     |
|              | D183A R     | GAA GAA CAG GAG TCT GGC AAA AAT GGG CTC CAC     |
| R71AH72A     | R71AH72A F  | CGC CGG CGT CTC CAA GGC AGC CCT GCG GGG CGA CCA |
|              | R71AH72A R  | TGG TCG CCC CGC AGG GCT GCC TTG GAG ACG CCG GCG |
| E85AE86A     | E85AE86A F  | CGG GGG CAA CGC GGC GGG CTG CGA G               |
|              | E85AE86A R  | CTC GCA GCC CGC CGC GTT GCC CCC G               |
